# Supplementary material for: Contrasting carbon cycling in the benthic food webs between river-fed, high-energy canyon and upper continental slope
Source: Copernicus journal article supplement (doi:10.5194/bg-2023-161), 2023-09-19
Supplement: Supplementary file [file bg-2023-161-AC1-supplement.pdf]

- Hendriks, A. J. (1999). Allometric scaling of rate, age and density parameters in ecological models. *Oikos*, 293-310.
- Tenore, K. R. (1982). Comparison of the ecological energetics of the polychaetes *Capitella capitata* and *Nereis succinea* in experimental systems receiving similar levels of detritus. *Netherlands Journal of Sea Research*, 16, 46-54.
- van Oevelen, D., Soetaert, K., & Heip, C. (2012). Carbon flows in the benthic food web of the Porcupine Abyssal Plain: The (un) importance of labile detritus in supporting microbial and faunal carbon demands. *Limnology and Oceanography*, 57(2), 645-664.
- Middelboe, M., & Glud, R. N. (2006). Viral activity along a trophic gradient in continental margin sediments off central Chile. *Marine Biology Research*, 2(01), 41-51.
- Danovaro, R., Dell'Anno, A., Corinaldesi, C., Magagnini, M., Noble, R., Tamburini, C., & Weinbauer, M. (2008). Major viral impact on the functioning of benthic deep-sea ecosystems. *Nature*, 454(7208), 1084-1087.
- Van Oevelen, D., Soetaert, K., Garcia, R., De Stigter, H. C., Cunha, M. R., Pusceddu, A., & Danovaro, R. (2011). Canyon conditions impact carbon flows in food webs of three sections of the Nazaré canyon. *Deep Sea Research Part II: Topical Studies in Oceanography*, 58(23-24), 2461-2476.
- Rowe, G.T., Wei, C.L., Nunnally, C., Haedrich, R., Montagna, P., Baguley, J.G., Bernhard, J.M., Wicksten, M., Ammons, A., Briones, E.E., Soliman, Y., Deming, J.W., 2008. Comparative biomass structure and estimated carbon flow in food webs in the deep Gulf of Mexico. *Deep-Sea Research* 55 (24–26), 2699–2711.
- Middelburg, J. J., Vlug, T., Jaco, F., & Van der Nat, W. A. (1993). Organic matter mineralization in marine systems. *Global and Planetary change*, 8(1-2), 47-58.
- Hedges, J. I., & Keil, R. G. (1995). Sedimentary organic matter preservation: an assessment and speculative synthesis. *Marine chemistry*, 49(2-3), 81-115.
- Middelburg, J. J., & Meysman, F. J. (2007). Burial at sea. *Science*, 316(5829), 1294-1295.
